# Supplementary material
Source: HighWire-hosted journal article supplement (https://militaryhealth.bmj.com/content/167/4/234)
Supplement: inline-supplementary-material-1 [file inline-supplementary-material-1.pdf]

# Supplementary material

## 1. Search strategy

### 1.1. Step by step search guide

- Tools – Time – 20 January to 21 March
- Settings – Advanced search – Region (select country being searched, e.g. France, Italy)
- Examine the first 120 search hits
- For help with reading the search results
  - Open in a new browser tab [www.translate.google.com](http://www.translate.google.com)
  - Open each result link from the search results in a new tab, copy the link address at the top into the left-hand box of [www.translate.google.com](http://www.translate.google.com), select the native language (e.g. Hungarian, Italian) in the left-hand window, select “English” in the right-hand window. Click the right-hand link.
  - A new tab will open where Google Translate will translate the page from native language (e.g. French, Italian) into English. It will look like the below.
  - Read through the page and make your assessment based on inclusion criteria.
  - DO NOT CLOSE THIS TAB ABOVE when you’re done. Just go back to the original search results, open a new link separately and copy-paste the link address at the top of this latest tab (where it says “Translate” in red). The page will automatically be translated into English from the native language.
- We are doing this process in 2 steps, first, focusing on “time” and will look for the first calendar mention of military involvement (step 1); in step 2 we will take a closer look at “behaviours”.

### 1.2. Search terms/strings

Search terms that will be used to identify the relevant instances of civil-military cooperation cover two semantic areas: COVID-19: COVID-19, coronavirus, SARS-CoV-2; and Security: security, military, army, armed forces, civil-military, police.

| Country | Search string                                                          |
|---------|------------------------------------------------------------------------|
| UK      | UK OR “United Kingdom” OR “covid 19” OR (military or army or security) |
| France  | France OR “covid 19” OR (militaire or armee or securite)               |
| Spain   | Espana OR “covid 19” OR (militar or ejercito or seguridad)             |
| Italy   | Italia OR “covid 19” OR (militare or esercito or sicurezza)            |
| Belgium | Belgique OR “covid 19” OR (militaire or armee or securite)             |
| Sweden  | Sverige OR “covid 19” OR (militär or armén or säkerhet)                |

### 1.3. Inclusion & exclusion criteria

|                           |                                                                       |
|---------------------------|-----------------------------------------------------------------------|
| <b>Inclusion criteria</b> | Information on military/security incorporation into national response |
|                           | Relating to current COVID19 outbreak                                  |
|                           | Relating to set target countries                                      |
| <b>Exclusion criteria</b> | Not about military/security                                           |
|                           | Not about COVID19                                                     |
|                           | Not about target country                                              |
|                           | Other COVID19 limited to civilian sector only                         |
|                           | Not suitable for instant translation (e.g. PDF file format).          |

## 2. List of descriptive category definitions

|    | Category                                                                      | Definition                                                                                                                                                                                                |
|----|-------------------------------------------------------------------------------|-----------------------------------------------------------------------------------------------------------------------------------------------------------------------------------------------------------|
| 1  | <b>Recognition of health security threat from coronavirus in Wuhan</b>        | envisioned to mark articles that acknowledge distant threat in Wuhan as reported by military health sources                                                                                               |
| 2  | <b>First imported case</b>                                                    | Any reports of first imported case of COVID19 into the country                                                                                                                                            |
| 3  | <b>First internally transmitted case</b>                                      | Any reports of first internally transmitted COVID19 case in the country                                                                                                                                   |
| 4  | <b>Military case</b>                                                          | For reported military COVID cases and positive tests                                                                                                                                                      |
| 5  | <b>Invocation of national crisis response planning</b>                        | The moment when national government level crisis response is initiated (not necessarily involving the military)                                                                                           |
| 6  | <b>Declaration of military in support of national response</b>                | Declaration or statement of intent by national government to use military/armed forces as part of the national response                                                                                   |
| 7  | <b>Allocation of military capability to national response - other</b>         | General support of military to more than one domain for national response and/or mentions of strategy or plan of support, not covered in the categories above, including legislations or formal decisions |
| 8  | <b>Use of military expertise to build 'temporary hospitals'</b>               | Non-medical buildings such as conference centres and hotels being converted to clinical facilities using military expertise & support (managed by civilians)                                              |
| 9  | <b>Use of military hospitals for civilian patients</b>                        | Using of already existing military hospitals for civilian patients (new arrangements due to COVID)                                                                                                        |
| 10 | <b>Deployment of military (field) hospitals to augment local capacity</b>     | Deployment of temporary medical facilities to support local capacity (add to surge capacity) - managed by the military personnel                                                                          |
| 11 | <b>Military support to Covid testing</b>                                      | Includes both testing facilities and/or laboratory testing                                                                                                                                                |
| 12 | <b>Use of military personnel to augment civilian manpower (incl. medical)</b> | Supplying military personnel (medical and non-medical) to fill gaps/needs for manpower for civilian-led activities                                                                                        |
| 13 | <b>Mobilisation of Reservists (including medical)</b>                         | Activation of reserve recruits for general or medical purposes                                                                                                                                            |

|           |                                                                                                                |                                                                                                                                                                                      |
|-----------|----------------------------------------------------------------------------------------------------------------|--------------------------------------------------------------------------------------------------------------------------------------------------------------------------------------|
| <b>14</b> | <b>Military support to repackaging and supply chain/distribution management for PPE and essential supplies</b> | Includes all aspects of logistics and supply chain for PPE and essential supplies in general                                                                                         |
| <b>15</b> | <b>Military assistance to police/public order</b>                                                              | Includes monitoring streets, policing, and maintaining order or lockdowns                                                                                                            |
| <b>16</b> | <b>Military repatriation flights</b>                                                                           | Using military support to augment commercial repatriation of nationals from international destinations.                                                                              |
| <b>17</b> | <b>Use of military medical evacuation assets</b>                                                               | Transport using ground ambulances, aeroplanes, or trains nationally or regionally within the country or region for collection or redistribution or to meet medical needs of patients |
| <b>18</b> | <b>Military aeromedical evacuation flights</b>                                                                 | Using military support for aeromedical support + evacuation for patients from international destinations                                                                             |
| <b>19</b> | <b>Protection of core military capability by modifying activities</b>                                          | If military activity is continuing but with COVID-19 arrangements to protect core military capacity                                                                                  |
| <b>20</b> | <b>Reduction of internal military activities</b>                                                               | Cancelling or withdrawing military personnel from activities within national borders                                                                                                 |
| <b>21</b> | <b>Reduction of external military activities</b>                                                               | Cancelling or withdrawing military personnel from activities overseas                                                                                                                |
| <b>22</b> | <b>Rumours/allegations related to Covid19</b>                                                                  | Covering all aspects for which there is no factual evidence and attempts to refute them (e.g. allegations about the origin of COVID-19)                                              |
| <b>23</b> | <b>Other – military and Covid</b>                                                                              | Military specific stories or narratives that emerged because of COVID19 not categorised above                                                                                        |
